# Supplementary material
Source: publisher figshare collection journal article supplement (https://tandf.figshare.com/ndownloader/files/20268606)
Supplement: Supplementary file 1 [file 20268606]

**Supplementary Information**

**Molecular dynamics and computational study of Mannich-based coumarin derivatives: Potent tyrosine kinase inhibitors**

**Table S1**

Predicted properties of the coumarin derivatives designed in the present study

| Derivatives | Lipinski rule of five (RO5) | | | | |  | Predicted lethal doses, toxicity class | | Drug likeness | Blood brain barrier  (0=high and 3= low) | Human intestinal absorption  (0=high and 3= low) | Caco-2 permeability  (0=high and 3= low) |
| --- | --- | --- | --- | --- | --- | --- | --- | --- | --- | --- | --- | --- |
|  | MW  (≤ 500 g/mol) | No. of H-ba  (≤10) | No. of H-bd  (≤10) | cLogP  value  (≤5) | tPSA  (Å) | %ABS | LD50  (mg/kg) | Class |
| 7a | 383.14 | 7 | 2 | 1.83 | 71.07 | 84.481 | 450 | 4 | 1.27 | 0.60 | 0.85 | 0.63 |
| 7b | 396.17 | 7 | 2 | 1.88 | 66.64 | 86.009 | 400 | 4 | 1.51 | 0.53 | 0.74 | 0.75 |
| 7c | 369.16 | 6 | 2 | 2.89 | 62.45 | 87.455 | 450 | 4 | 1.20 | 0.65 | 0.83 | 0.64 |
| 7d | 341.13 | 3 | 2 | 1.91 | 62.52 | 87.431 | 233 | 3 | 1.11 | 0.75 | 0.81 | 0.70 |
| 7e | 355.14 | 6 | 2 | 2.40 | 62.66 | 87.382 | 450 | 4 | 1.32 | 0.57 | 0.91 | 0.66 |
| 7f | 465.16 | 5 | 2 | 5.71 | 61.39 | 87.820 | 3200 | 5 | 0.57 | 075 | 0.54 | 0.63 |
| 7g | 381.16 | 6 | 2 | 3.14 | 63.16 | 87.210 | 300 | 3 | 1.45 | 0.74 | 0.88 | 0.71 |
| 7h | 495.11 | 6 | 2 | 6.26 | 60.15 | 88.248 | 1500 | 4 | 0.96 | 0.53 | 0.81 | 0.60 |
| 7i | 367.14 | 6 | 2 | 2.79 | 63.53 | 87.082 | 300 | 3 | 1.35 | 0.85 | 0.93 | 0.73 |
| 7j | 463.14 | 5 | 2 | 5.65 | 61.16 | 87.900 | 233 | 3 | 0.54 | 0.78 | 0.92 | 0.67 |
| 7k | 413.13 | 5 | 2 | 4.28 | 62.01 | 87.607 | 233 | 3 | 0.92 | 0.67 | 0.71 | 0.61 |
| 7l | 364.11 | 6 | 2 | 1.95 | 72.44 | 84.008 | 3000 | 5 | 1.04 | 0.67 | 0.72 | 0.64 |
| 7m | 382.15 | 7 | 3 | 1.26 | 75.12 | 83.084 | 400 | 4 | 1.35 | 0.51 | 0.78 | 0.50 |
| 8a | 397.15 | 7 | 1 | 2.18 | 62.15 | 87.558 | 450 | 4 | 1.35 | 0.88 | 0.87 | 0.74 |
| 8b | 410.18 | 7 | 1 | 2.23 | 57.72 | 89.087 | 400 | 4 | 1.61 | 0.83 | 0.85 | 0.81 |
| 8c | 383.17 | 6 | 1 | 3.24 | 53.53 | 90.532 | 450 | 4 | 1.28 | 0.66 | 0.89 | 0.72 |
| 8d | 355.14 | 6 | 1 | 2.26 | 53.60 | 90.508 | 3000 | 5 | 1.17 | 0.56 | 0.78 | 0.76 |
| 8e | 369.16 | 6 | 1 | 2.75 | 53.74 | 90.460 | 450 | 4 | 1.40 | 0.74 | 0.95 | 0.73 |
| 8f | 479.17 | 5 | 1 | 6.06 | 52.47 | 90.898 | 300 | 3 | 0.62 | 0.51 | 0.60 | 0.73 |
| 8g | 395.17 | 6 | 1 | 3.49 | 54.25 | 90.284 | 300 | 3 | 1.55 | 0.92 | 0.90 | 079 |
| 8h | 509.13 | 6 | 1 | 6.61 | 51.23 | 91.326 | 1500 | 4 | 1.02 | 0.76 | 0.85 | 0.66 |
| 8i | 381.16 | 6 | 1 | 3.13 | 54.61 | 90.160 | 300 | 3 | 1.44 | 0.96 | 0.94 | 0.80 |
| 8j | 477.16 | 5 | 1 | 6.00 | 52.54 | 90.874 | 3000 | 5 | 0.66 | 0.92 | 0.94 | 0.75 |
| 8k | 427.14 | 5 | 1 | 4.63 | 53.09 | 90.684 | 3000 | 5 | 1.02 | 0.92 | 0.94 | 0.75 |
| **8l** | **378.12** | **6** | **1** | **2.30** | **63.52** | **87.086** | **3000** | **5** | **1.11** | **0.50** | **0.61** | **0.63** |
| 8m | 396.17 | 7 | 2 | 1.61 | 66.21 | 86.158 | 400 | 4 | 1.44 | 0.70 | 0.73 | 0.64 |

**Table S2**

**Docking scores of coumarin derivatives (7a-7m and 8a-8m) against tyrosine kinase receptor obtained from AutoDock**

| Compounds | IUPAC name;  Molecular formula | Chemical structure | Docking score (kcal/mol) |  |  |
| --- | --- | --- | --- | --- | --- |
| 7a | 3-((3,4-dimethoxyphenyl)(1H-imidazol-1-yl)methyl)-4-hydroxy-2H-chromen-2-one  Chemical Formula: C21H18N2O5 |  | -6.24 |  |  |
| 7b | 4-hydroxy-3-((4-hydroxy-3-methoxyphenyl)(4-methylpiperazin-1-yl)methyl)-2H-chromen-2-one  Chemical Formula: C22H24N2O5 |  | -6.14 |  |  |
| 7c | 3-((diethylamino)(4-hydroxy-3-methoxyphenyl)methyl)-4-hydroxy-2H-chromen-2-one  Chemical Formula: C21H23NO5 |  | -6.02 |  |  |
| 7d | 3-((dimethylamino)(4-hydroxy-3-methoxyphenyl)methyl)-4-hydroxy-2H-chromen-2-one  Chemical Formula: C19H19NO5 |  | -6.02 |  |  |
| 7e | 3-((ethyl(methyl)amino)(4-hydroxy-3-methoxyphenyl)methyl)-4-hydroxy-2H-chromen-2-one  Chemical Formula: C20H21NO5 |  | -6.03 |  |  |
| 7f | 3-((diphenylamino)(4-hydroxy-3-methoxyphenyl)methyl)-4-hydroxy-2H-chromen-2-one  Chemical Formula: C29H23NO5 |  | -6.70 |  |  |
| 7g | 4-hydroxy-3-((4-hydroxy-3-methoxyphenyl)(piperidin-1-yl)methyl)-2H-chromen-2-one  Chemical Formula: C22H23NO5 |  | -5.44 |  |  |
| 7h | 4-hydroxy-3-((4-hydroxy-3-methoxyphenyl)(10H-phenothiazin-10-yl)methyl)-2H-chromen-2-one  Chemical Formula: C29H21NO5S |  | -6.16 |  |  |
| 7i | 4-hydroxy-3-((4-hydroxy-3-methoxyphenyl)(pyrrolidin-1-yl)methyl)-2H-chromen-2-one  Chemical Formula: C21H21NO5 |  | -6.14 |  |  |
| 7j | 3-((9H-carbazol-9-yl)(4-hydroxy-3-methoxyphenyl)methyl)-4-hydroxy-2H-chromen-2-one  Chemical Formula: C29H21NO5 |  | -6.64 |  |  |
| 7k | 4-hydroxy-3-((4-hydroxy-3-methoxyphenyl)(1H-indol-1-yl)methyl)-2H-chromen-2-one  Chemical Formula: C25H19NO5 |  | -5.54 |  |  |
| 7l | 4-hydroxy-3-((4-hydroxy-3-methoxyphenyl)(1H-imidazol-1-yl)methyl)-2H-chromen-2-one  Chemical Formula: C20H16N2O5 |  | -6.89 |  |  |
| 7m | 4-hydroxy-3-((4-hydroxy-3-methoxyphenyl)(piperazin-1-yl)methyl)-2H-chromen-2-one  Chemical Formula: C21H22N2O5 |  | -5.16 |  |  |
| 8a | 3-((3,4-dimethoxyphenyl)(morpholino)methyl)-4-hydroxy-2H-chromen-2-one  Chemical Formula: C22H23NO6 |  | -6.42 |  |  |
| 8b | 3-((3,4-dimethoxyphenyl)(4-methylpiperazin-1-yl)methyl)-4-hydroxy-2H-chromen-2-one  Chemical Formula: C23H26N2O5 |  | -6.05 |  |  |
| 8c | 3-((diethylamino)(3,4-dimethoxyphenyl)methyl)-4-hydroxy-2H-chromen-2-one  Chemical Formula: C22H25NO5 |  | -6.04 |  |  |
| 8d | 3-((3,4-dimethoxyphenyl)(dimethylamino)methyl)-4-hydroxy-2H-chromen-2-one  Chemical Formula: C20H21NO5 |  | -6.90 |  |  |
| 8e | 3-((3,4-dimethoxyphenyl)(ethyl(methyl)amino)methyl)-4-hydroxy-2H-chromen-2-one  Chemical Formula: C21H23NO5 |  | -5.94 |  |  |
| 8f | 3-((3,4-dimethoxyphenyl)(diphenylamino)methyl)-4-hydroxy-2H-chromen-2-one  Chemical Formula: C30H25NO5 |  | -5.44 |  |  |
| 8g | 3-((3,4-dimethoxyphenyl)(piperidin-1-yl)methyl)-4-hydroxy-2H-chromen-2-one  Chemical Formula: C23H25NO5 |  | -5.78 |  |  |
| 8h | 3-((3,4-dimethoxyphenyl)(10H-phenothiazin-10-yl)methyl)-4-hydroxy-2H-chromen-2-one  Chemical Formula: C30H23NO5S |  | -5.90 |  |  |
| 8i | 3-((3,4-dimethoxyphenyl)(pyrrolidin-1-yl)methyl)-4-hydroxy-2H-chromen-2-one  Chemical Formula: C22H23NO5 |  | -6.0 |  |  |
| 8j | 3-((9H-carbazol-9-yl)(3,4-dimethoxyphenyl)methyl)-4-hydroxy-2H-chromen-2-one  Chemical Formula: C30H23NO5 |  | -6.91 |  |  |
| 8k | 3-((3,4-dimethoxyphenyl)(1H-indol-1-yl)methyl)-4-hydroxy-2H-chromen-2-one  Chemical Formula: C26H21NO5 |  | -6.86 |  |  |
| 8l | 4-hydroxy-3-((4-hydroxy-3-methoxyphenyl)(morpholino)methyl)-2H-chromen-2-one  Chemical Formula: C21H21NO6 |  | -6.93 |  |  |
| 8m | 3-((3,4-dimethoxyphenyl)(piperazin-1-yl)methyl)-4-hydroxy-2H-chromen-2-one  Chemical Formula: C22H24N2O5 |  | -5.49 |  |  |

**Figures**


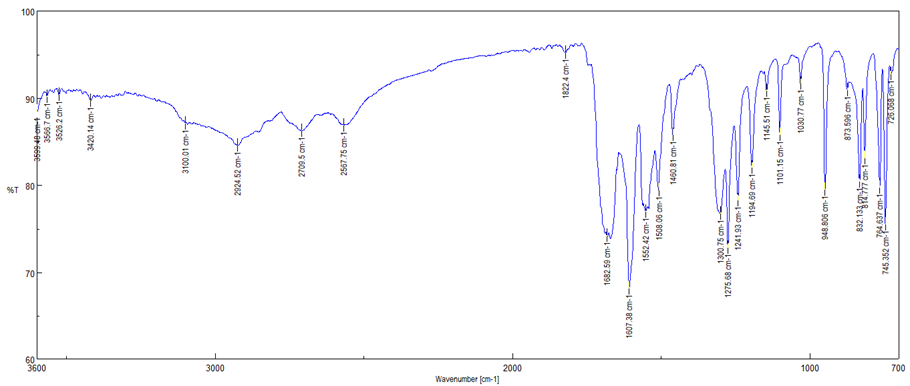


**Figure S1.** FTIR spectra of compound 8l (4-hydroxy-3-((4-hydroxy-3-methoxyphenyl)(morpholino)methyl)-2H-chromen-2-one).


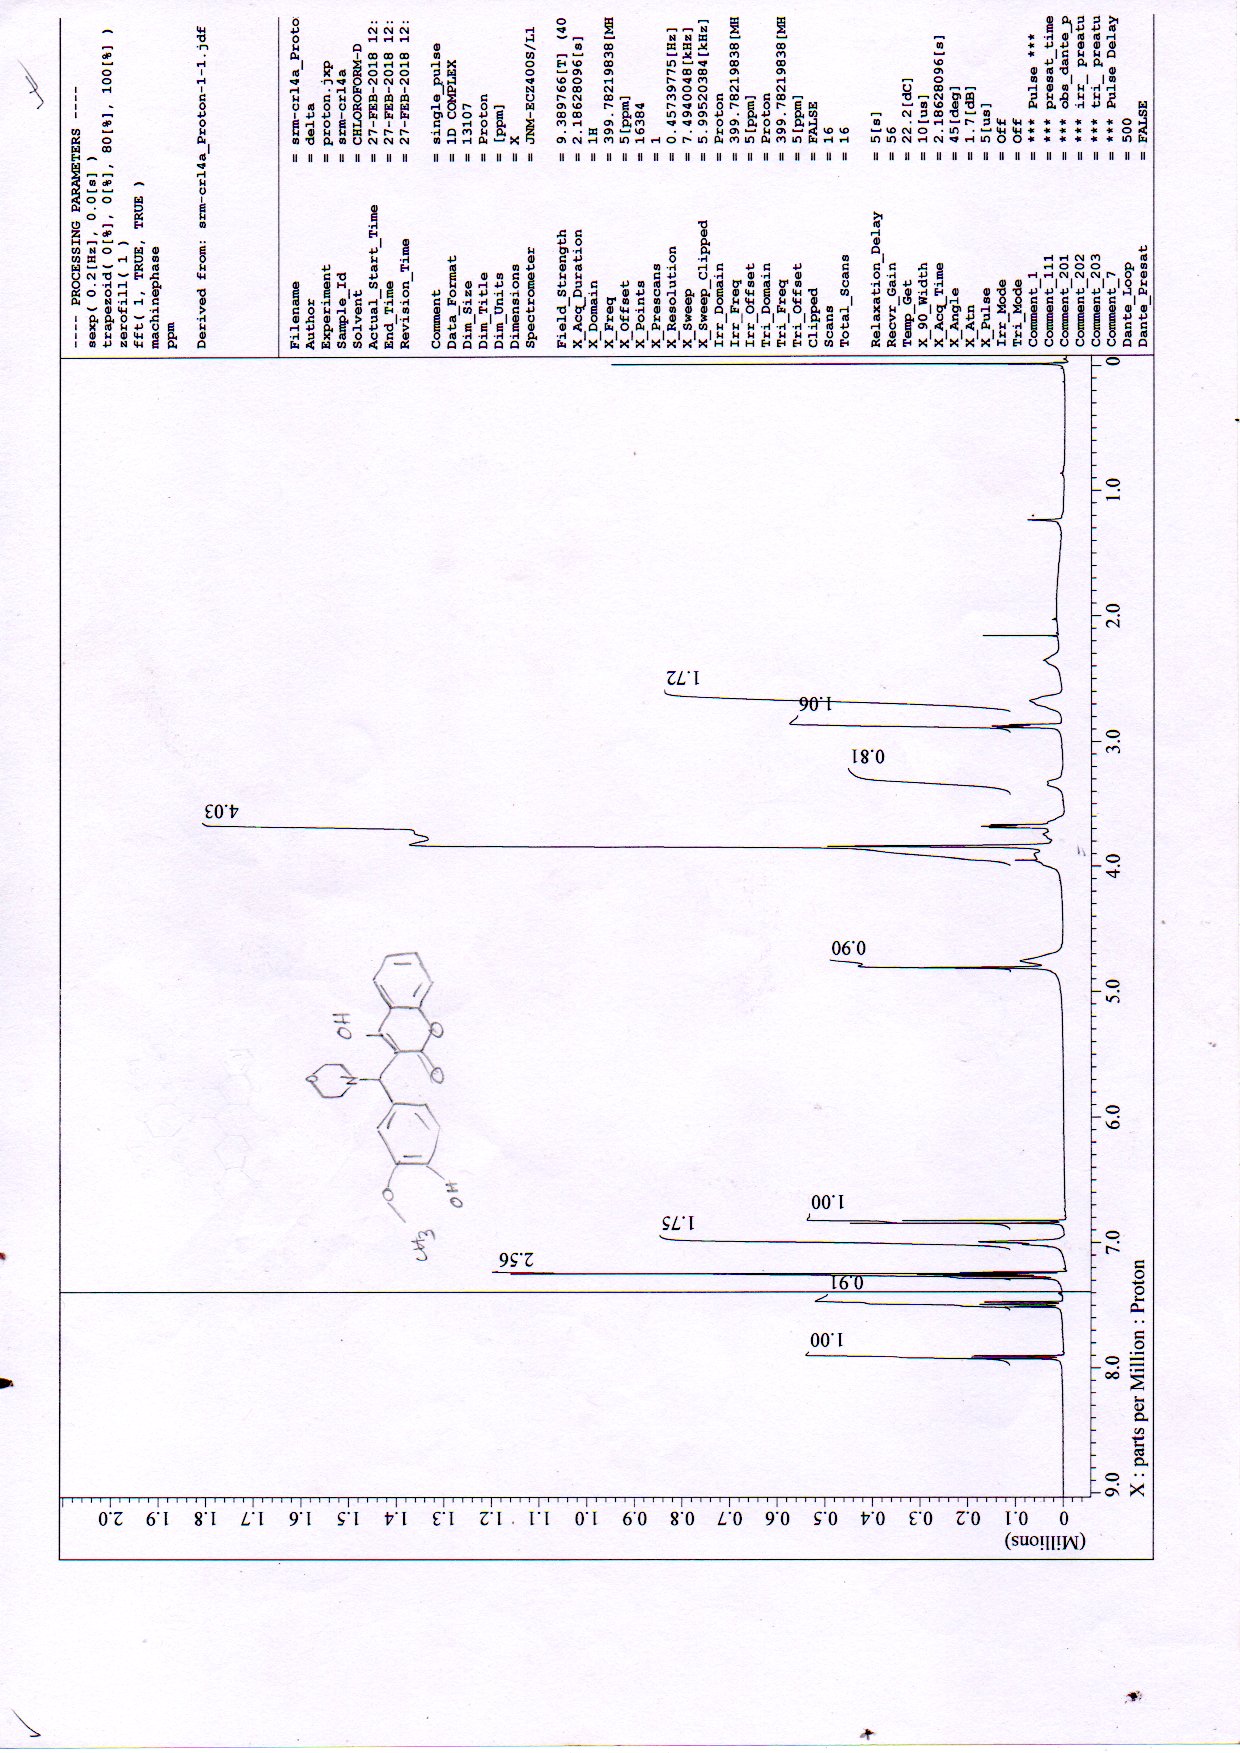


**Figure S2.** 1H spectra of compound 8l (4-hydroxy-3-((4-hydroxy-3-methoxyphenyl)(morpholino)methyl)-2H-chromen-2-one).


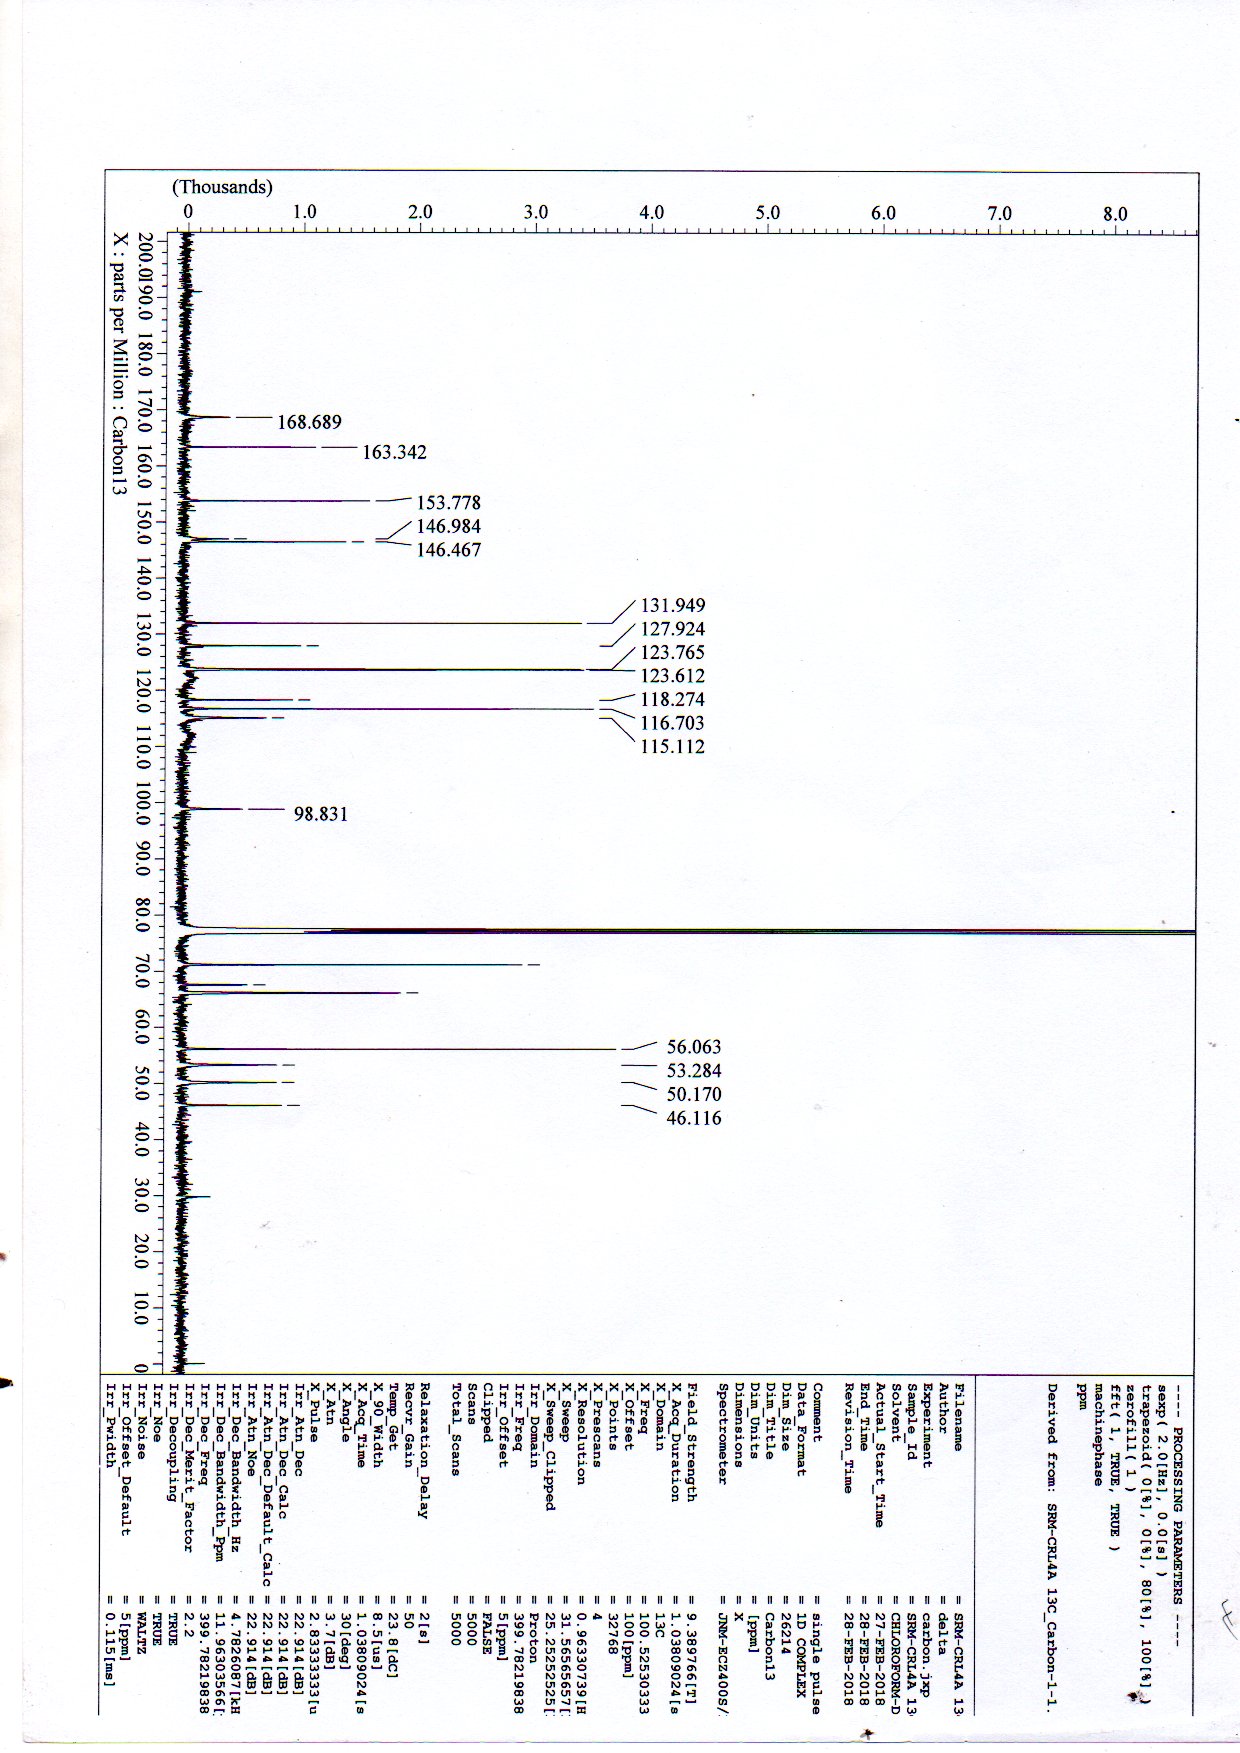


**Figure S3.** 13C spectra of compound 8l (4-hydroxy-3-((4-hydroxy-3-methoxyphenyl)(morpholino)methyl)-2H-chromen-2-one).
